# Supplementary material for: Male-killing Wolbachia and mitochondrial selective sweep in a migratory African insect
Source: BMC Evol Biol. 2012 Oct 15;12:204. doi: 10.1186/1471-2148-12-204 (PMC3557208; doi:10.1186/1471-2148-12-204)
Supplement: Additional file 1 — Table S1. Wolbachia infection prevalence within the 59 sampled populations of African armyworm Spodoptera exempta. [file 1471-2148-12-204-S1.pdf]

## Supporting Information

**Table S1:** *Wolbachia* infection prevalence within the 59 sampled populations of African armyworm *Spodoptera exempta*

| Season  | Site no. | Site          | Date collected | no.tested | wExe1 | wExe2 | wExe3 |
|---------|----------|---------------|----------------|-----------|-------|-------|-------|
| 2007/08 | 1        | Bangala       | 21/12/2007     | 16        | 0     | 0     | 0     |
| 2007/08 | 2        | Makanya       | 22/12/2007     | 18        | 0     | 0     | 0     |
| 2007/08 | 3        | Kitivo        | 23/12/2007     | 18        | 0     | 1     | 0     |
| 2007/08 | 4        | Magole        | 12/01/2008     | 18        | 1     | 5     | 0     |
| 2007/08 | 5        | Buti Visaraka | 13/01/2008     | 18        | 0     | 10    | 0     |
| 2007/08 | 6        | Msimba        | 14/01/2008     | 18        | 0     | 3     | 0     |
| 2007/08 | 7        | Vibaoni       | 11/02/2008     | 24        | 1     | 0     | 2     |
| 2007/08 | 8        | Kivesa        | 12/02/2008     | 28        | 0     | 0     | 3     |
| 2007/08 | 9        | Mungushi      | 02/04/2008     | 18        | 1     | 0     | 0     |
| 2007/08 | 10       | Mwangaza      | 02/04/2008     | 18        | 1     | 0     | 0     |
| 2007/08 | 11       | Olumerili     | 03/04/2008     | 18        | 0     | 0     | 1     |
| 2007/08 | 12       | Embukoi       | 03/04/2008     | 18        | 1     | 0     | 0     |
| 2007/08 | 13       | Sanya         | 04/04/2008     | 18        | 2     | 0     | 0     |
| 2007/08 | 14       | Bomani        | 04/04/2008     | 18        | 2     | 0     | 0     |
| 2007/08 | 15       | Kwa Lodo      | 05/04/2008     | 18        | 0     | 0     | 0     |
| 2007/08 | 16       | Embukoi       | 07/04/2008     | 18        | 4     | 0     | 0     |
| 2007/08 | 17       | Lerai         | 08/04/2008     | 18        | 1     | 0     | 0     |
| 2007/08 | 18       | Geza Ulole    | 08/04/2008     | 18        | 0     | 0     | 0     |
| 2007/08 | 19       | Ishnde        | 13/04/2008     | 18        | 0     | 0     | 1     |
| 2007/08 | 20       | Kisima        | 14/04/2008     | 18        | 0     | 0     | 6     |
| 2007/08 | 21       | Mgagao        | 14/04/2008     | 18        | 0     | 0     | 1     |
| 2009/10 | 1        | Mwembe V      | 16/12/2009     | 24        | 0     | 0     | 0     |
| 2009/10 | 2        | Katani        | 17/12/2009     | 24        | 2     | 1     | 0     |
| 2009/10 | 3        | Katani        | 17/12/2009     | 24        | 2     | 1     | 0     |
| 2009/10 | 4        | Bugulu        | 19/12/2009     | 24        | 0     | 3     | 3     |
| 2009/10 | 5        | Katani        | 19/12/2009     | 24        | 1     | 1     | 1     |
| 2009/10 | 6        | Mgareni       | 20/12/2009     | 24        | 0     | 1     | 1     |
| 2009/10 | 7        | Katani        | 21/12/2009     | 24        | 0     | 0     | 2     |
| 2009/10 | 8        | Lumemo        | 28/12/2009     | 12        | 1     | 0     | 1     |
| 2009/10 | 9        | Idete         | 29/12/2009     | 12        | 0     | 0     | 0     |
| 2009/10 | 10       | Ihanga        | 29/12/2009     | 12        | 1     | 0     | 0     |
| 2009/10 | 11       | Kiberege      | 30/12/2009     | 12        | 0     | 2     | 0     |
| 2009/10 | 12       | Kidatu        | 31/12/2009     | 12        | 0     | 0     | 0     |
| 2009/10 | 13       | Magole        | 31/12/2009     | 12        | 1     | 1     | 1     |
| 2009/10 | 14       | Mombo         | 27/01/2010     | 12        | 1     | 1     | 0     |
| 2009/10 | 15       | Mandela       | 28/01/2010     | 12        | 1     | 1     | 3     |
| 2009/10 | 16       | Kanzeni       | 29/01/2010     | 12        | 0     | 0     | 1     |
| 2009/10 | 17       | Loto          | 03/02/2010     | 12        | 0     | 0     | 0     |
| 2009/10 | 18       | Gocho         | 04/02/2010     | 12        | 0     | 0     | 0     |
| 2009/10 | 19       | Giting        | 04/02/2010     | 12        | 0     | 1     | 0     |
| 2009/10 | 20       | Morogoro      | 29/01/2010     | 12        | 0     | 0     | 3     |
| 2010/11 | 1        | Chanzuru      | 10/01/2011     | 12        | 1     | 4     | 0     |
| 2010/11 | 2        | Msimba        | 11/01/2011     | 12        | 0     | 0     | 0     |
| 2010/11 | 3        | Teko          | 12/01/2011     | 12        | 1     | 0     | 2     |
| 2010/11 | 4        | Chanzuru      | 12/01/2011     | 12        | 0     | 0     | 1     |
| 2010/11 | 5        | Mbigiri       | 22/01/2011     | 12        | 0     | 0     | 0     |
| 2010/11 | 6        | Msufini       | 22/01/2011     | 12        | 0     | 0     | 0     |
| 2010/11 | 7        | Msufini       | 24/01/2011     | 12        | 0     | 1     | 0     |
| 2010/11 | 8        | Kwemazandu    | 26/02/2011     | 12        | 2     | 0     | 0     |
| 2010/11 | 9        | Mandela       | 28/02/2011     | 12        | 0     | 1     | 1     |
| 2010/11 | 10       | Makuyu        | 01/03/2011     | 12        | 0     | 0     | 1     |
| 2010/11 | 11       | Magole        | 01/03/2011     | -         | -     | -     | -     |
| 2010/11 | 12       | Kweingoma     | 08/04/2011     | 12        | 1     | 0     | 0     |
| 2010/11 | 13       | Mgambo        | 08/04/2011     | 12        | 2     | 0     | 0     |
| 2010/11 | 14       | Mkokola       | 09/04/2011     | 12        | 0     | 0     | 0     |
| 2010/11 | 15       | Emau          | 09/04/2011     | 12        | 0     | 0     | 0     |
| 2010/11 | 16       | Mtonga        | 10/04/2011     | 12        | 0     | 0     | 0     |
| 2010/11 | 17       | Mandela       | 10/04/2011     | 12        | 0     | 0     | 0     |
| 2010/11 | 18       | Kwengoma      | 11/04/2011     | 12        | 0     | 0     | 0     |
| 2010/11 | 19       | Bagamoyo      | 11/04/2011     | 12        | 2     | 0     | 0     |
